P3619

## Incidence of progressively reduced LVEF during long-year follow-up after myocardial infarction: impact for mid-term outcomes

G. Yoshioka<sup>1</sup>, Y. Shibata<sup>1</sup>, K. Node<sup>2</sup>, N. Watanabe<sup>1</sup>, N. Kuriyama<sup>1</sup>, H. Koiwaya<sup>1</sup>, K. Ogata<sup>1</sup>, Y. Goriki<sup>1</sup>, K. Shinzato<sup>1</sup><sup>1</sup>Miyazaki Medical Association Hospital, Cardiovascular center, Miyazaki, Japan; <sup>2</sup>Saga University Hospital, Saga, Japan

**Background:** Severely reduced left ventricular ejection fraction (LVEF $\leq$ 35%) is commonly seen in approximately 5% of the myocardial infarction (MI) survivors in its acute-phase, which is recognized as a risk factor of post-MI cardiac death. However, clinical impact of the progressively reduced LVEF in the chronic-phase after MI has not been clarified.

**Purpose:** To evaluate clinical impact of the progressively reduced LVEF in the chronic-phase after MI.

**Method:** We evaluated 1659 consecutive patients with acute MI by serial echocardiography. Primary outcome was severely reduced LVEF. And secondary outcome was all cause death and cardiac death.

**Result:** During follow-up (median: 1097 days), severely reduced LVEF

newly developed in 8.6% of AMI survivors. These patients had significantly higher incidence of all cause death (20.7% vs. 4.4%,  $p<0.01$ ) and cardiac death (10.6% vs. 1.2%,  $p<0.01$ ) than those with LVEF $>$ 35%. Severely reduced LVEF progressed in the chronic-phase associated with all cause death and cardiac death as well as those with severely reduced EF in the acute-phase.

**Conclusions:** Progressively reduced LVEF during chronic-phase occurred 8.6% per 10-year in MI survivors. Careful long-term follow-up after MI should be needed to identify possible candidate for the implantable cardioverter-defibrillator.

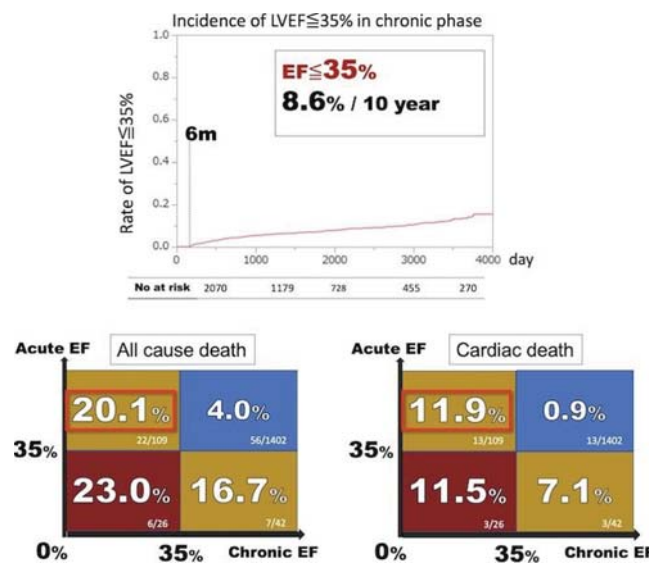

Figure 1
